# Supplementary material
Source: MDPI journal article supplement (https://www.mdpi.com/1424-8247/16/3/390)

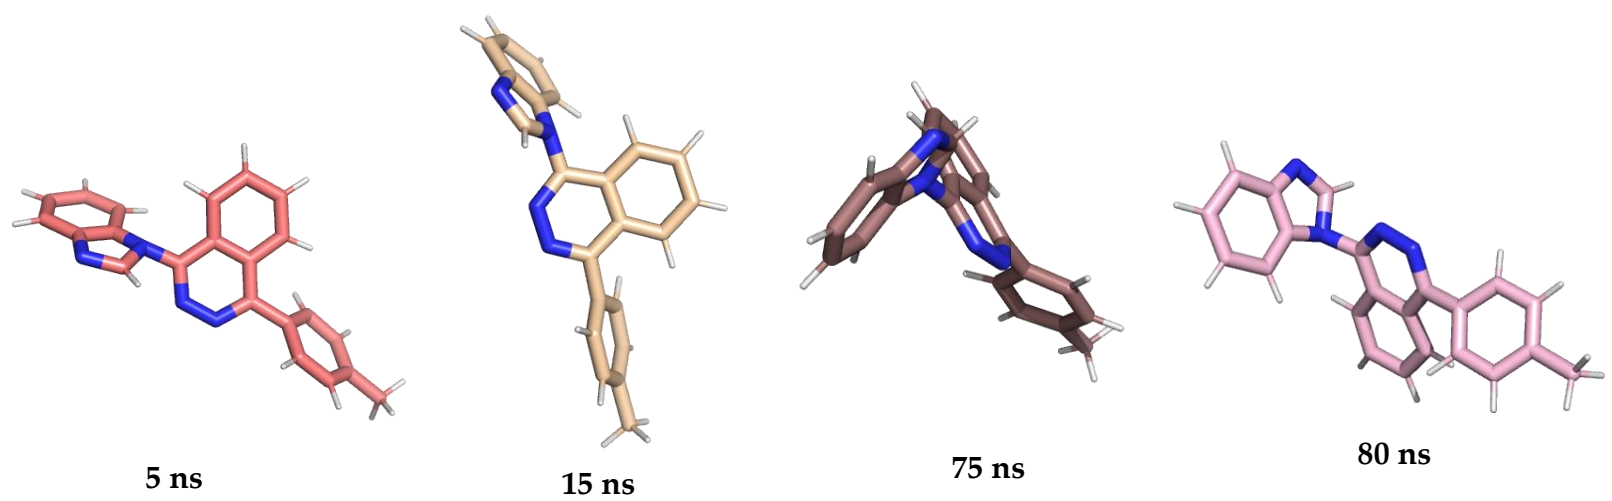

**Figure S1.** Molecular dynamics trajectory analysis of the E2-LmTIM complex.

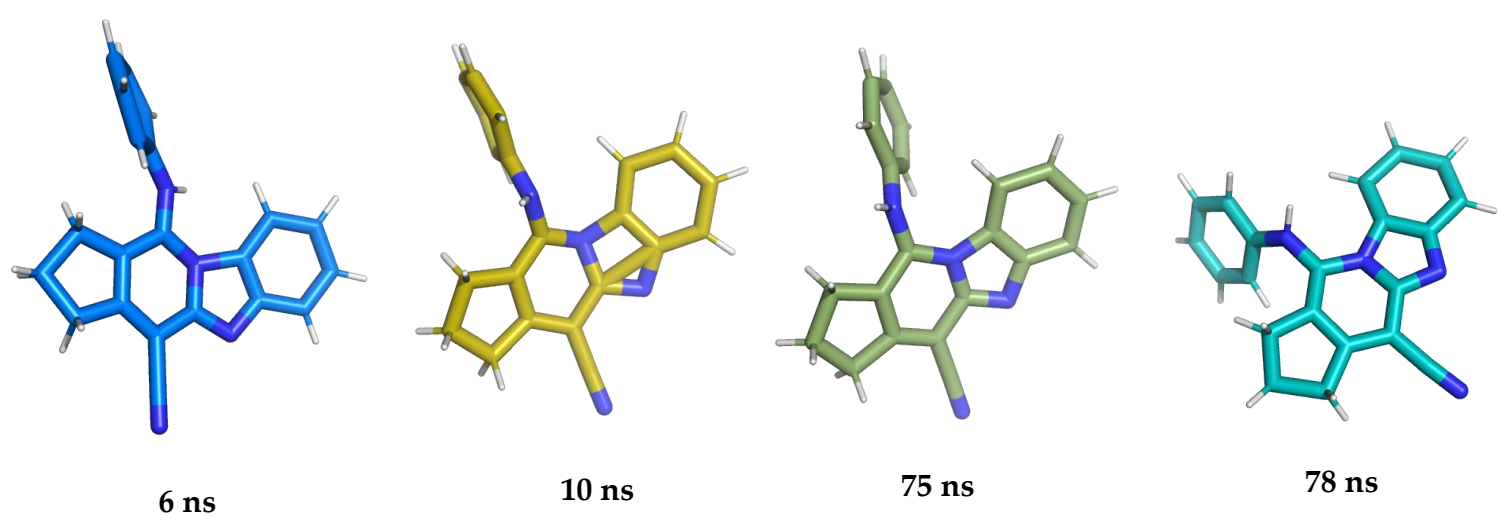

**Figure S2.** Molecular dynamics trajectory analysis of the P9-LmTIM complex.

**Figure S3.** Interaction profile of the P9-*Lm*TIM complex during molecular dynamics analysis.

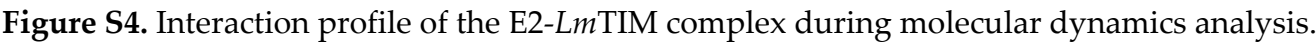

Supplement: s1 [file s1]
